# Supplementary material for: Controllable synthesis and enhanced gas sensing properties of a single-crystalline WO3–rGO porous nanocomposite
Source: Royal Society of Chemistry journal article supplement (doi:10.1039/c6ra28379a), 2017-01-01
Supplement: c6ra28379a1.pdf [file c6ra28379a1.pdf]

## Electronic Supporting Information

# Controllable synthesis and enhanced gas sensing properties of single-crystalline WO<sub>3</sub>-rGO porous nanocomposite

Qin Hao,<sup>a</sup> Tie Liu,<sup>a</sup> Jingyuan Liu,<sup>a,\*</sup> Qi Liu,<sup>a</sup> Xiaoyan Jing,<sup>a</sup> Hongquan Zhang,<sup>b</sup> Guoqing Huang,<sup>c</sup>  
and Jun Wang<sup>a,\*</sup>

<sup>a</sup> Key Laboratory of Superlight Material and Surface Technology, Ministry of Education, Harbin Engineering University, Harbin 150001, PR China.

<sup>b</sup> School of Automation, Harbin Engineering University, Harbin 150001, PR China.

<sup>c</sup> Handan Purification Equipment Research Institute, Handan 056027, P.R. Chinas.

\* Corresponding author: Tel.: +86 451 8253 3026; Fax: +86 451 8253 3026; E-mail: [zhqw1888@sohu.com](mailto:zhqw1888@sohu.com).

## Experimental procedure

**Synthesis of WO<sub>3</sub> porous nanolamellas.** In a typical synthesis procedure performed as follow,<sup>S1</sup> sodium tungstate (99.5% purity, 6.12 mmol) was dissolved in 12.5 mL of DW (distilled water) by ultrasonic treatment. Next, 12.5 mL HCl solution (37%, 2 M) was added dropwise under gentle magnetic stirring. Brief, the mixture of H<sub>2</sub>C<sub>2</sub>O<sub>4</sub> (99.5% purity, 1.53 mmol) and DW (25 mL) were added into the precursor solution. After stirring ca.20 min, the final solution was transferred to a Teflon-lined stainless autoclave, which was heated 180°C for 5h in air flow electric oven. After cooling down, the obtained yellow precipitate washed by distilled water and ethanol several times prior to being dried at 60 °C for 10 h. Eventually, the final lamellar sample was collected after the calcination process at 500 °C for the gas sensing test further.

## Associated contents:

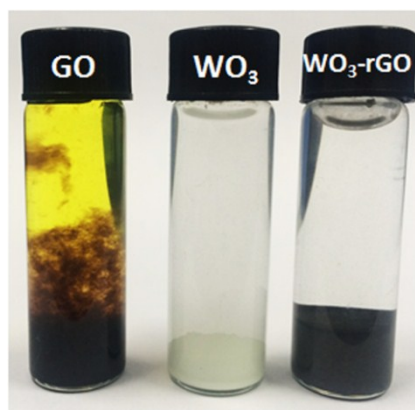

**Fig. S1** The photographs of three samples solution: (a) the GO solution, (b) WO<sub>3</sub> solution and (c) WO<sub>3</sub>-rGO solution.

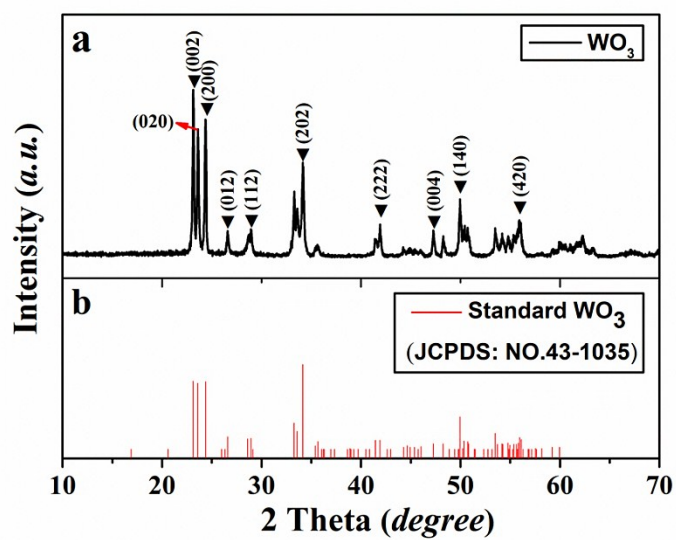

**Fig. S2** XRD patterns of precursor of (a) WO<sub>3</sub> nanolamellas after annealing, S2; (b) the standard card of WO<sub>3</sub> (JCPDS no. 43-1035).

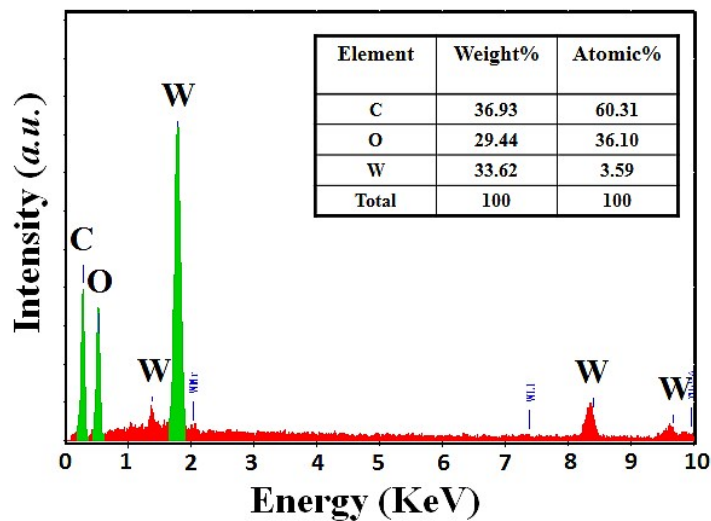

Fig. S3 The EDS analysis spectrum of final  $\text{WO}_3$ -rGO sample after calcination (S1).

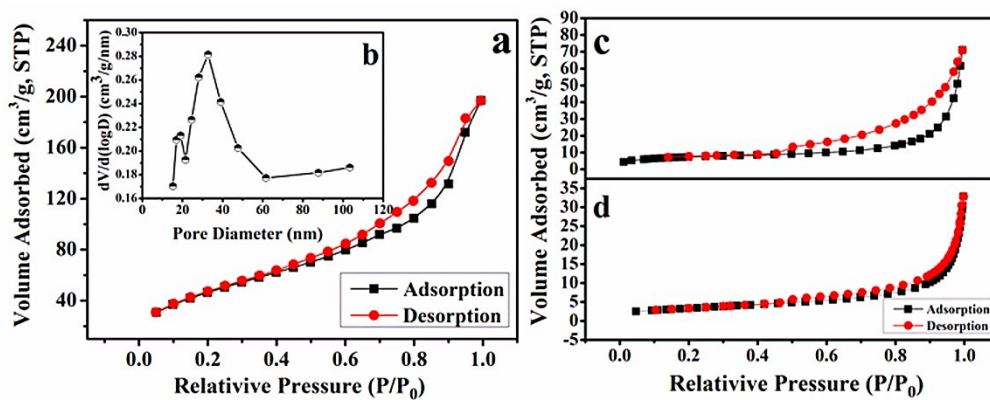

Fig. S4 (a)  $\text{N}_2$  adsorption-desorption isotherm, (b, inset) BJH pore-size distribution plots of S1; (c, d)  $\text{N}_2$  adsorption-desorption isotherms of S2 and S3, respectively.

## Reference

S1 T. Liu, J. Liu, Q. Hao, X. Jing, H. Zhang, G. Huang and J. Wang, *CrystEngComm*, 2016, **18**, 8411-8418.
